# Supplementary material
Source: Springer Nature journal article supplement (https://www.springermedizin.de/resource/supplementary/13550_2013_173_MOESM4_ESM.pdf/9687744)

**A**

Surviving fraction

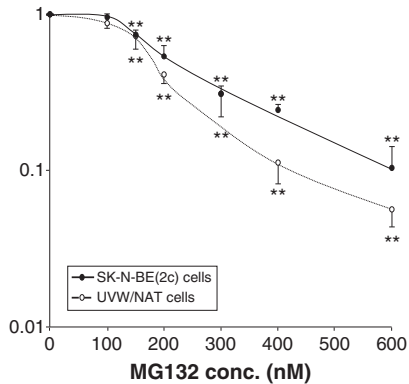**B**

Surviving fraction

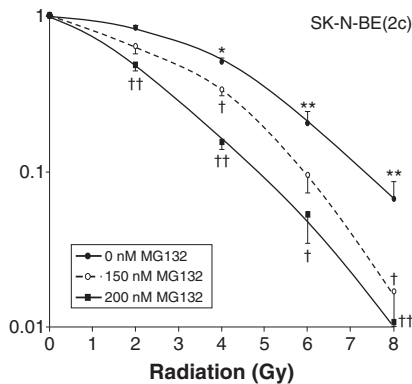**C**

Surviving fraction

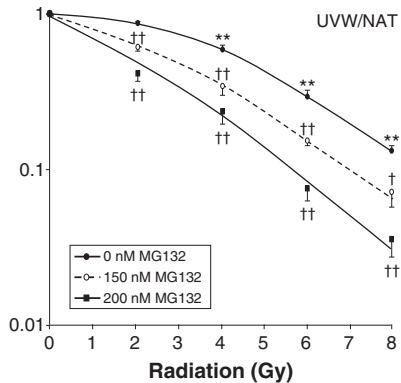

Supplement: MOESM4 [file 9687744]
